# Supplementary material for: Effects of probiotic supplementation on glucose metabolism in pregnant women without diabetes: a systematic review and meta-analysis
Source: Royal Society of Chemistry journal article supplement (doi:10.1039/d1fo04333a), 2022-01-01
Supplement: d1fo04333a1.pdf [file d1fo04333a1.pdf]

## Search strategies:

**Search: Up to 4 April 2021**

### PubMed:

#1 (((((((pregnancy[MeSH Terms]) OR (pregnancies[MeSH Terms])) OR (gestation[MeSH Terms])) OR (pregnancy[Text Word])) OR (pregnancies[Text Word])) OR (gestation[Text Word])) OR (pregnancy[Title/Abstract])) OR (pregnancies[Title/Abstract])) OR (gestation[Title/Abstract]) (1041717)

#2 (((((((((((blood glucose[MeSH Terms]) OR (blood sugar[MeSH Terms])) OR (sugar,blood[MeSH Terms])) OR (glucose,blood[MeSH Terms])) OR (blood glucose[Text Word])) OR (blood sugar[Text Word])) OR (sugar,blood[Text Word])) OR (glucose blood[Text Word])) OR (blood glucose[Title/Abstract])) OR (blood sugar[Title/Abstract])) OR (sugar,blood[Title/Abstract])) OR (glucose,blood[Title/Abstract]) (212630)

#3 (((((((((((((((probiotics[MeSH Terms]) OR (probiotic[MeSH Terms])) OR (saccharomyce[MeSH Terms])) OR (bifidobacterium[MeSH Terms])) OR (lactobacillus[MeSH Terms])) OR (streptococcus[MeSH Terms])) OR (probiotics[Text Word])) OR (probiotic[Text Word])) OR (saccharomyce[Text Word])) OR (bifidobacterium[Text Word])) OR (lactobacillus[Text Word])) OR (streptococcus[Text Word])) OR (probiotics[Title/Abstract])) OR (probiotic[Title/Abstract])) OR (saccharomyce[Title/Abstract])) OR (bifidobacterium[Title/Abstract])) OR (lactobacillus[Title/Abstract])) OR (streptococcus[Title/Abstract]) (282745)

#4 (((((((((((((((((((((((((((((((Gestational Diabetes Mellitus[MeSH Terms]) OR (Diabetes, Gestational[MeSH Terms])) OR (Diabetes, Pregnancy-Induced[MeSH Terms])) OR (Diabetes, Pregnancy Induced[MeSH Terms])) OR (Pregnancy-Induced Diabetes[MeSH Terms])) OR (Gestational Diabetes[MeSH Terms])) OR (Diabetes Mellitus, Gestational[MeSH Terms])) OR (Fasting blood glucose[MeSH

Terms])) OR (Glucose Tolerance Test[MeSH Terms])) OR (Glucose Tolerance Tests[MeSH Terms])) OR (Oral Glucose Tolerance Test[MeSH Terms])) OR (OGTT[MeSH Terms])) OR (Oral Glucose Tolerance[MeSH Terms])) OR (Glucose Tolerance, Oral[MeSH Terms])) OR (Intravenous Glucose Tolerance Test[MeSH Terms])) OR (Intravenous Glucose Tolerance[MeSH Terms])) OR (Homeostasis model assessment insulin resistance[MeSH Terms])) OR (Insulin[MeSH Terms])) OR (quantitative insulin sensitivity check index/Insulin Sensitivity Test Index[MeSH Terms])) OR (Gestational Diabetes Mellitus[Text Word])) OR (Diabetes, Gestational[Text Word])) OR (Diabetes, Pregnancy-Induced[Text Word])) OR (Diabetes, Pregnancy Induced[Text Word])) OR (Pregnancy-Induced Diabetes[Text Word])) OR (Gestational Diabetes[Text Word])) OR (Diabetes Mellitus, Gestational[Text Word])) OR (Fasting blood glucose[Text Word])) OR (Glucose Tolerance Test[Text Word])) OR (Oral Glucose Tolerance Test[Text Word])) OR (OGTT[Text Word])) OR (Oral Glucose Tolerance[Text Word])) OR (Glucose Tolerance, Oral[Text Word])) OR (Intravenous Glucose Tolerance Test[Text Word])) OR (Intravenous Glucose Tolerance[Text Word])) OR (Homeostasis model assessment insulin resistance[Text Word])) OR (Insulin[Text Word])) OR (QUICKI [Text Word])) OR (quantitative insulin sensitivity check index/Insulin Sensitivity Test Index[Text Word])) OR (Gestational Diabetes Mellitus[Title/Abstract])) OR (Diabetes, Gestational[Title/Abstract])) OR (Diabetes, Pregnancy-Induced[Title/Abstract])) OR (Diabetes, Pregnancy Induced[Title/Abstract])) OR (Pregnancy-Induced Diabetes[Title/Abstract])) OR (Gestational Diabetes[Title/Abstract])) OR (Diabetes Mellitus, Gestational[Title/Abstract])) OR (Fasting blood glucose[Title/Abstract])) OR (Glucose Tolerance Test[Title/Abstract])) OR (Glucose Tolerance Tests[Title/Abstract])) OR (Oral Glucose Tolerance Test[Title/Abstract])) OR (OGTT[Title/Abstract])) OR (Oral Glucose Tolerance[Title/Abstract])) OR (Glucose Tolerance, Oral[Title/Abstract])) OR (Intravenous Glucose Tolerance Test[Title/Abstract])) OR (Intravenous Glucose Tolerance[Title/Abstract])) OR (Homeostasis model assessment insulin resistance[Title/Abstract])) OR (Insulin[Title/Abstract])) OR (QUICKI[Title/Abstract])) OR (quantitative insulin sensitivity check

index/Insulin Sensitivity Test Index[Title/Abstract]) (468937)

#1 AND #2 AND #3 AND #4 (44)

**Web of science :**

#1 (TS=(Gestational period OR pregnancy OR pregnancies OR gestation) OR TI=(Gestational period OR pregnancy OR pregnancies OR gestation) OR AB=(Gestational period OR pregnancy OR pregnancies OR gestation)) (320557)

#2 (TS=(Blood Glucose OR Blood Sugar OR Sugar, Blood OR Glucose, Blood OR glycemic) OR TI=(Blood Glucose OR Blood Sugar OR Sugar, Blood OR Glucose, Blood OR glycemic) OR AB=(Blood Glucose OR Blood Sugar OR Sugar, Blood OR Glucose, Blood OR glycemic)) (150809)

#3 (TS=(Probiotic OR Saccharomyce OR bifidobacteria OR lactobacillus OR streptococcus) OR TI=(Probiotic OR Saccharomyce OR bifidobacteria OR lactobacillus OR streptococcus OR Lactobacillus acidophilus OR Lactobacillus amylovorus OR Lactobacillus ) OR AB=(Probiotic OR Saccharomyce OR bifidobacteria OR lactobacillus OR streptococcus OR Lactobacillus )) (111122)

#4 (TS=(GDM OR gestational diabetes mellitus OR OGTT OR Glucose Tolerance Test OR oral glucose tolerance test OR intravenous glucose tolerance test OR intravenous glucose tolerance OR FBG OR fasting blood glucose OR HOMA-IR OR homeostasis model assess insulin resistance OR insulin OR Insulin concentration OR QUICKI OR quantitative insulin

sensitivity check index OR Insulin Sensitivity Test Index) OR TI=(GDM OR gestational diabetes mellitus OR OGTT OR Glucose Tolerance Test OR oral glucose tolerance test OR intravenous glucose tolerance test OR intravenous glucose tolerance OR FBG OR fasting blood glucose OR HOMA-IR OR homeostasis model assess insulin resistance OR insulin OR Insulin concentration OR QUICKI OR quantitative insulin sensitivity check index OR Insulin Sensitivity Test Index) OR AB= (GDM OR gestational diabetes mellitus OR OGTT OR Glucose Tolerance Test OR oral glucose tolerance test OR intravenous glucose tolerance test OR intravenous glucose tolerance OR FBG OR fasting blood glucose OR HOMA-IR OR homeostasis model assess insulin resistance OR insulin OR Insulin concentration OR QUICKI OR quantitative insulin sensitivity check index OR Insulin Sensitivity Test Index) ) (333426)

#6 (TS=(randomized controlled trail OR random OR controlled clinical trail OR randomized OR randomly) OR AB=(randomized controlled trail OR random OR controlled clinical trail OR randomized OR randomly)) (1320476)

Results: :

#1 AND #2 AND #3 AND #4 (37)

## **CNKI**

篇关摘=(妊娠期 + 孕妇) AND 篇关摘=(血糖 + 胰岛素 + 糖耐量试验 + 糖尿病 + GDM) AND 篇关摘=(益生菌 + 酵母菌 + 乳酸菌 + 乳酸杆菌 + 链球菌 + 保加利亚杆菌 + 双歧杆菌 + 乳杆菌) (214)

## Wanfang database

主题:(妊娠 OR 妊娠期 OR 怀孕 OR 受孕 OR 怀胎 OR 有身孕)  
and 主题:(益生菌 OR 酵母菌 OR 双歧杆菌 OR 乳酸菌 OR 链球菌  
OR 乳杆菌 OR 保加利亚杆菌 OR 乳酸杆菌)and 主题:(血糖 OR  
GDM OR OGTT OR 口服糖耐量试验 OR FBG OR 空腹血糖 OR  
HOMA-IR OR 稳态模型评估 OR 胰岛素抵抗 OR 胰岛素浓度 OR  
QUICKI OR 胰岛素敏感性检测指数) (114)
