# Supplementary material for: Effects of probiotic supplementation on glucose metabolism in pregnant women without diabetes: a systematic review and meta-analysis
Source: Royal Society of Chemistry journal article supplement (doi:10.1039/d1fo04333a), 2022-01-01
Supplement: d1fo04333a2.pdf [file d1fo04333a2.pdf]

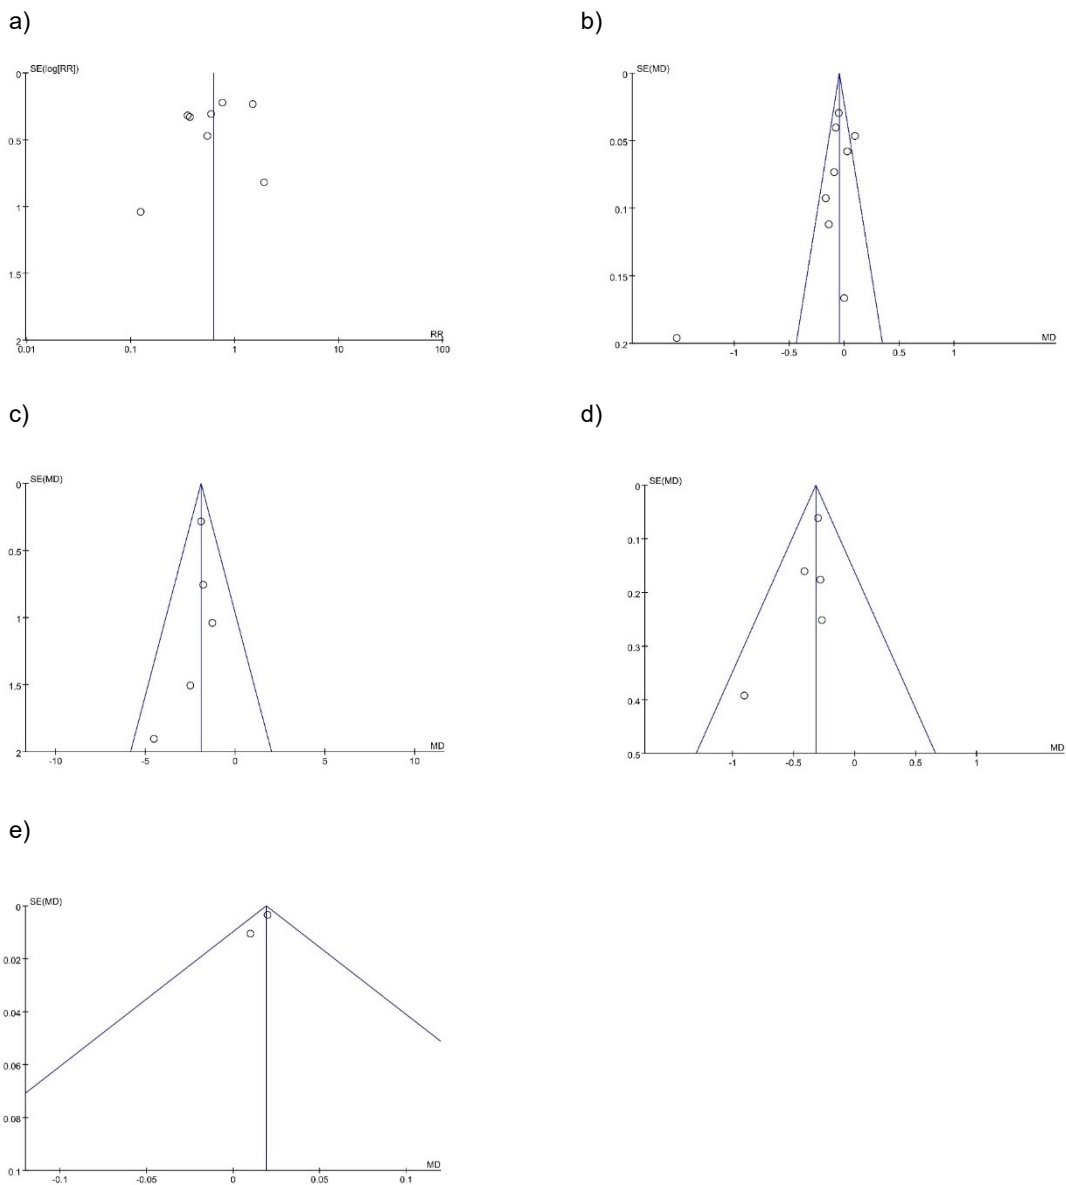

Fig S1. The Funnel plot of publication bias. a: Funnel plot of publication bias on incidence of GDM. b: Funnel plot of publication bias on FBG. c: Funnel plot of publication bias on insulin concentration. d: Funnel plot of publication bias on HOMA-IR. e: Funnel plot of publication bias on QUICKI.

a)

Begg's Test

```

adj. Kendall's Score (P-Q) = -12
Std. Dev. of Score = 9.59
Number of Studies = 9
z = -1.25
Pr > |z| = 0.211
z = 1.15 (continuity corrected)
Pr > |z| = 0.251 (continuity corrected)

```

Egger's test

| Std_Eff | Coef.     | Std. Err. | t     | P> t  | [95% Conf. Interval] |          |
|---------|-----------|-----------|-------|-------|----------------------|----------|
| slope   | .3829851  | .3391401  | 1.13  | 0.296 | -.4189538            | 1.184924 |
| bias    | -3.640788 | 2.190606  | -1.66 | 0.140 | -8.820748            | 1.539172 |

b)

Begg's Test

```

adj. Kendall's Score (P-Q) = -6
Std. Dev. of Score = 8.08
Number of Studies = 8
z = -0.74
Pr > |z| = 0.458
z = 0.62 (continuity corrected)
Pr > |z| = 0.536 (continuity corrected)

```

Egger's test

| Std_Eff | Coef.     | Std. Err. | t     | P> t  | [95% Conf. Interval] |          |
|---------|-----------|-----------|-------|-------|----------------------|----------|
| slope   | .1406133  | .4903172  | 0.29  | 0.784 | -1.05915             | 1.340376 |
| bias    | -1.450192 | 1.461322  | -0.99 | 0.359 | -5.025918            | 2.125534 |

c)

Begg's Test

```

adj. Kendall's Score (P-Q) = -6
Std. Dev. of Score = 4.08
Number of Studies = 5
z = -1.47
Pr > |z| = 0.142
z = 1.22 (continuity corrected)
Pr > |z| = 0.221 (continuity corrected)

```

Egger's test

| Std_Eff | Coef.     | Std. Err. | t     | P> t  | [95% Conf. Interval] |          |
|---------|-----------|-----------|-------|-------|----------------------|----------|
| slope   | .8674022  | .5203942  | 1.67  | 0.194 | -.7887244            | 2.523529 |
| bias    | -7.194607 | 2.807097  | -2.56 | 0.083 | -16.12804            | 1.738827 |

d)

Begg's Test

```

adj. Kendall's Score (P-Q) = -4
Std. Dev. of Score = 4.08
Number of Studies = 5
z = -0.98
Pr > |z| = 0.327
z = 0.73 (continuity corrected)
Pr > |z| = 0.462 (continuity corrected)

```

Egger's test

| Std_Eff | Coef.     | Std. Err. | t     | P> t  | [95% Conf. Interval] |          |
|---------|-----------|-----------|-------|-------|----------------------|----------|
| slope   | .6202128  | .4295205  | 1.44  | 0.244 | -.7467132            | 1.987139 |
| bias    | -5.677548 | 2.329184  | -2.44 | 0.093 | -13.09005            | 1.734955 |

e)

Begg's Test

```

adj. Kendall's Score (P-Q) = -2
Std. Dev. of Score = 4.08
Number of Studies = 5
z = -0.49
Pr > |z| = 0.624
z = 0.24 (continuity corrected)
Pr > |z| = 0.806 (continuity corrected)

```

Egger's test

| Std_Eff | Coef.     | Std. Err. | t     | P> t  | [95% Conf. Interval] |          |
|---------|-----------|-----------|-------|-------|----------------------|----------|
| slope   | .0610372  | .1687372  | 0.36  | 0.742 | -.4759599            | .5980344 |
| bias    | -.9795232 | 1.27752   | -0.77 | 0.499 | -5.045163            | 3.086116 |

f)

Begg's Test

```

adj. Kendall's Score (P-Q) = -2
Std. Dev. of Score = 4.08
Number of Studies = 5
z = -0.49
Pr > |z| = 0.624
z = 0.24 (continuity corrected)
Pr > |z| = 0.806 (continuity corrected)

```

Egger's test

| Std_Eff | Coef.     | Std. Err. | t     | P> t  | [95% Conf. Interval] |          |
|---------|-----------|-----------|-------|-------|----------------------|----------|
| slope   | .014654   | .3020454  | 0.05  | 0.964 | -.9465893            | .9758973 |
| bias    | -.3727339 | 2.297034  | -0.16 | 0.881 | -7.682922            | 6.937455 |

Fig.S2. The Begg's and Egger's test of publication bias of glucose metabolism parameters. a) Fasting blood glucose; b) Gestational diabetes mellitus (GDM) incidence; c) Insulin concentration; d) homeostasis model assessment of insulin resistance (HOMA-IR); e) 1-h OGTT; f) 2-h OGTT
