# Supplementary material for: Effects of probiotic supplementation on glucose metabolism in pregnant women without diabetes: a systematic review and meta-analysis
Source: Royal Society of Chemistry journal article supplement (doi:10.1039/d1fo04333a), 2022-01-01
Supplement: d1fo04333a3.pdf [file d1fo04333a3.pdf]

a)

| Study omitted     | Estimate   | [95% Conf. Interval] |            |
|-------------------|------------|----------------------|------------|
| Asgharian (2020)  | -0.1249976 | -0.23068376          | -0.0193114 |
| Halkjær (2020)    | -0.1464633 | -0.24929828          | -0.0436284 |
| cao (2020)        | -0.0659699 | -0.16979163          | 0.03785188 |
| Pellonperä (2019) | -0.1719774 | -0.27990277          | -0.0640521 |
| Callaway (2019)   | -0.2732171 | -0.39176902          | -0.1546652 |
| Wickens (2017)    | -0.1213644 | -0.23917558          | -0.0035532 |
| Jamilian (2016)   | -0.1342314 | -0.23742989          | -0.0310329 |
| Lindsay (2014)    | -0.1351206 | -0.24118897          | -0.0290523 |
| Asemi (2013)      | -0.129427  | -0.23295531          | -0.0258987 |
| Combined          | -0.1416872 | -0.24283161          | -0.0405429 |

b)

| Study omitted     | Estimate   | [95% Conf. Interval] |            |
|-------------------|------------|----------------------|------------|
| Asgharian (2020)  | 0.56848152 | 0.30378854           | 1.0638033  |
| Halkjær (2020)    | 0.51323779 | 0.28830185           | 0.91367096 |
| cao (2020)        | 0.61436907 | 0.35173668           | 1.073102   |
| Pellonperä (2019) | 0.5379865  | 0.27270557           | 1.0613259  |
| Callaway (2019)   | 0.45563885 | 0.29943123           | 0.69333702 |
| wang (2019)       | 0.62544934 | 0.3430241            | 1.1404064  |
| Wickens (2017)    | 0.55796103 | 0.28493424           | 1.0926048  |
| Luoto (2010)      | 0.63242147 | 0.35118546           | 1.1388766  |
| Combined          | 0.56197055 | 0.32106979           | 0.98362071 |

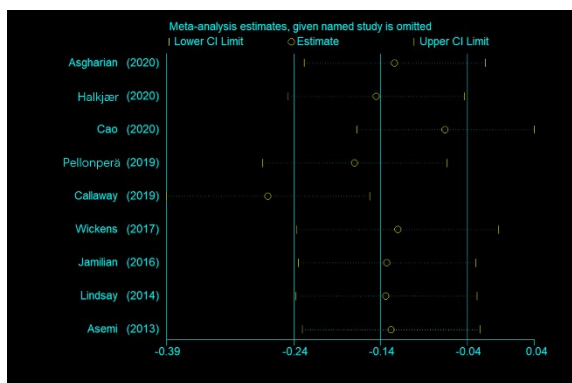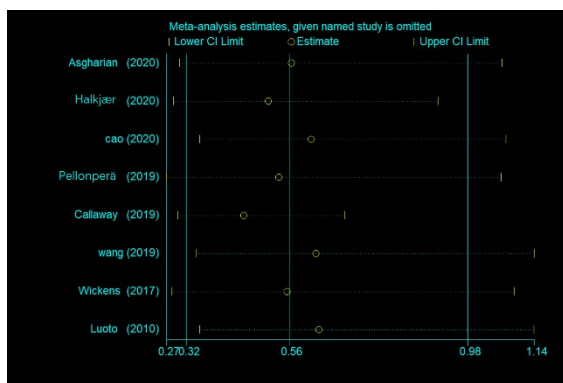

Table S1. Sensitivity analysis of the source of the heterogeneity. a) Fasting blood glucose; b) Gestational diabetes mellitus (GDM) incidence
