# Supplementary material for: Effects of probiotic supplementation on glucose metabolism in pregnant women without diabetes: a systematic review and meta-analysis
Source: Royal Society of Chemistry journal article supplement (doi:10.1039/d1fo04333a), 2022-01-01
Supplement: d1fo04333a4.pdf [file d1fo04333a4.pdf]

a)

|                                                |                 |        |
|------------------------------------------------|-----------------|--------|
| Meta-regression                                | Number of obs = | 9      |
| REML estimate of between-study variance        | tau2 =          | .2305  |
| % residual variation due to heterogeneity      | I-squared_res = | 87.52% |
| Proportion of between-study variance explained | Adj R-squared = | -9.28% |
| With Knapp-Hartung modification                |                 |        |

  

| _ES                  | Coef.    | Std. Err. | t     | P> t  | [95% Conf. Interval] |          |
|----------------------|----------|-----------|-------|-------|----------------------|----------|
| interventionduration | .2949685 | .4049563  | 0.73  | 0.490 | -.6626009            | 1.252538 |
| _cons                | -.654107 | .5321852  | -1.23 | 0.259 | -1.912525            | .604311  |

b)

|                                                |                 |        |
|------------------------------------------------|-----------------|--------|
| Meta-regression                                | Number of obs = | 5      |
| REML estimate of between-study variance        | tau2 =          | .2654  |
| % residual variation due to heterogeneity      | I-squared_res = | 83.64% |
| Proportion of between-study variance explained | Adj R-squared = | -9.78% |
| With Knapp-Hartung modification                |                 |        |

  

| _ES                  | Coef.     | Std. Err. | t     | P> t  | [95% Conf. Interval] |          |
|----------------------|-----------|-----------|-------|-------|----------------------|----------|
| interventionduration | .4605461  | .5116995  | 0.90  | 0.434 | -1.16791             | 2.089002 |
| _cons                | -1.230529 | .7723954  | -1.59 | 0.209 | -3.688636            | 1.227578 |

c)

|                                                |                 |         |
|------------------------------------------------|-----------------|---------|
| Meta-regression                                | Number of obs = | 5       |
| REML estimate of between-study variance        | tau2 =          | .1193   |
| % residual variation due to heterogeneity      | I-squared_res = | 72.88%  |
| Proportion of between-study variance explained | Adj R-squared = | -23.59% |
| With Knapp-Hartung modification                |                 |         |

  

| _ES                  | Coef.     | Std. Err. | t     | P> t  | [95% Conf. Interval] |          |
|----------------------|-----------|-----------|-------|-------|----------------------|----------|
| interventionduration | .3001929  | .3654692  | 0.82  | 0.472 | -.8628933            | 1.463279 |
| _cons                | -.9196711 | .5586804  | -1.65 | 0.198 | -2.697641            | .8582994 |

Fig. S3. Meta-regression of glucose metabolism parameters. a) Fasting blood glucose; b) Insulin concentration; c) Homeostasis model assessment of insulin resistance (HOMA-IR).
